# Supplementary material
Source: Research Square preprint supplement (doi:10.21203/rs.3.rs-9255645/v1)
Supplement: Supplementary file 1 [file 3990d386663e9a28ad68d8a5.docx]

|  | Controls | No DR | Mild DR | Moderate DR | Severe DR | p |
| --- | --- | --- | --- | --- | --- | --- |
| Individuals (eyes) | 13 (20) | 16 (27) | 16 (23) | 14 (20) | 14 (19) |  |
| VA (logMAR) | 0.09±0.03 | 0.13±0.1 | 0.14±0.09 | 0.17±0.18 | 0.13±0.15 | 0.130 |
| Age (Years) | 51±17.9 | 55±15.9 | 63.8±15.4 | 60.7±15.6 | 57.1±13.2 | 0.225 |
| Years of DM | - | 7.3±4.8 | 13.9±10.9 | 17.7±11.0 | 19.5±12.57 | 0.002* |
| A1C (%) | 5.4±0.4 | 7.2±1.6 | 7.4±0.9 | 8.0±1.3 | 8.8±2.1 | <0.001* |
|  |  | | |  |  |  |

**Table 1**: Summary of patients` demographics. VA: Best corrected visual acuity (logMAR). DM: Diabetes, DR: Diabetic Retinopathy. Data is presented as mean ± standard deviation. The p values correspond to ANOVA test between groups. *: p<0,05
