# Supplementary material
Source: Research Square preprint supplement (doi:10.21203/rs.3.rs-9255645/v1)
Supplement: Supplementary file 2 [file bd7e83d8aa5e51c6b31db940.docx]

|  | Control | No DR | Mild DR | Moderate DR | Severe DR | p |
| --- | --- | --- | --- | --- | --- | --- |
| ICA SVC (mean, μm²) | 2467 | 2236 | 2974 | 3547 | 4621 | **<0.001*** |
| SD | 594 | 406 | 956 | 549 | 1328 |  |
| ICA DVC (mean, μm²) | 4157 | 3513 | 8413 | 11712 | 10864 | **0.001*** |
| SD | 1579 | 1132 | 6862 | 5666 | 11175 |  |
| VI SVC (mean, %) | 59,6 | 61,5 | 57,5 | 55 | 52,1 | **<0.001*** |
| SD | 3,8 | 2,7 | 0,4 | 2,4 | 4 |  |
| VI DVC (mean, %) | 56,5 | 58,5 | 50,2 | 42,9 | 25,3 | **<0.001*** |
| SD | 5 | 4,1 | 7,9 | 7 | 2 |  |
| MIP SVC (mean, μm) | 14.9 | 14.3 | 15.6 | 16.7 | 18 | **<0.001*** |
| SD | 1.1 | 0.8 | 1.4 | 0.9 | 2.2 |  |
| MIP DVC (mean, μm) | 16.3 | 15.6 | 18.3 | 20.2 | 13.8 | **0.014*** |
| SD | 1.4 | 1.4 | 2.7 | 1.8 | 10.9 |  |
| RIPL area (mean, mm²) | 0 | 0 | 0.0025 | 0.0429 | 0.0382 | **<0.001*** |
| SD | 0 | 0 | 0.01 | 0.03 | 0.03 |  |
|  |  |  |  |  |  |  |

Table 2: Mean values for each variable and ANOVA test results. DR: Diabetic retinopathy; ICA: Intercapillary area; SD: Standard deviation; DVC: Deep vascular complex; SVC: Superficial vascular complex; VI: Vascular Index; MIP: Maximum ischemic point; RIPL: Retinal ischemic perivascular lesion. *: Statistically significant values (p<0.05)
