# Supplementary material
Source: Research Square preprint supplement (doi:10.21203/rs.3.rs-9255645/v1)
Supplement: Supplementary file 3 [file f8ef6c79d6875ff1062aa516.docx]

|  | | MIP Sup (μm) | | | MIP Deep (μm) | | | | |
| --- | --- | --- | --- | --- | --- | --- | --- | --- | --- |
| RIPL | | No | | Yes | No | | Yes | | |
| Mean |  | 15,23 |  | 17,73 |  | 17,31 | |  | 15,22 | |  |
| SD |  | 1,37 |  | 2,12 |  | 2,52 | |  | 10,03 | |  |
| Range |  | 13.0–18.1 |  | 14,6–21.6 |  | 13,1-23.4 | |  | 0,0-26.1 | |  |
| p |  | 0.0001* | | |  | 0.285 | | | | |  |
| Cohen’s d |  | 1.39 | | |  | 0.285 | | | | |  |

Table 3: Distribution of maximum ischemic point values in eyes with and without retinal ischemic perivascular lesions, and Student's t-test comparing both groups. MIP: Maximum ischemic point, Sup: Superficial vascular complex, Deep: Deep vascular complex, RIPL: Retinal ischemic perivascular lesion, SD: Standard deviation. *: p<0,05.
